# Supplementary material for: Identification of pharmacological inducers of a reversible hypometabolic state for whole organ preservation
Source: eLife. 2024 Sep 24;13:RP93796. doi: 10.7554/eLife.93796 (PMC11421850; doi:10.7554/eLife.93796)
Supplement: Supplementary file 1. [file elife-93796-supp1.xlsx]

## Sheet: SupplementaryFile1
		Before recirculating
		Pulse (bpm)	Rate	Rhythm	P waves	QRS waves	T waves
SNC80	P014	n/a	normocardic	irregular	no	no	n/a
	P015	n/a	tachycardic	irregular	no	no	n/a
	P019	n/a	n/a	n/a	n/a	n/a	n/a
	P023	12 bpm	bradycardic	irrregular	no	no	n/a
Vehicle	P016	n/a	tachycardic	irregular	no	no	n/a
	P020	n/a	tachycardic	irregular	no	no	n/a
	P024	n/a	tachycardia	irregular	no	no	n/a
		After defibrilation
		Pulse (bpm)	Rate	Rhythm	P waves	QRS waves	T waves
SNC80	P014	132 bpm	tachycardic	regular	yes	yes	T wave elevation
	P015	96bpm	normocardic	irregular	yes	yes	Normal T waves
	P019	54 bpm	bradycardic	irregular	some	yes	Inconsistent T wave depression
	P023	96 bpm	normocardic	regular	no	no	Unable to assess given supraventricular tachycardia
Vehicle	P016	144 bpm	tachycardic	regular	yes	yes	Slightly abnormal ST segment depression
	P020	132 bpm	tachycardic	regular	no	yes	T wave depression
	P024	138 bpm	tachycardic	regular	some	yes	T wave abnormal (P and T wave overlap)
